# Supplementary material
Source: Springer Nature journal article supplement (https://www.springermedizin.de/resource/supplementary/12935_2013_408_MOESM5_ESM.pdf/9540436)

### Apoptosis effect of PEITC and Taxol on MCF7 cells

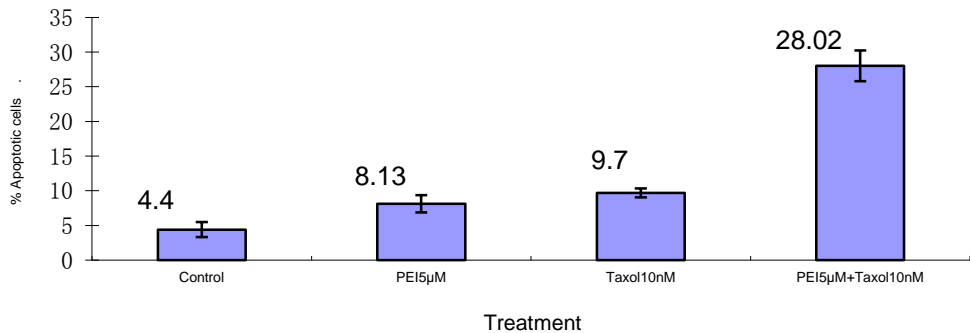

### Apoptosis effect of PEITC and Taxol on MDA-MB-231 cells

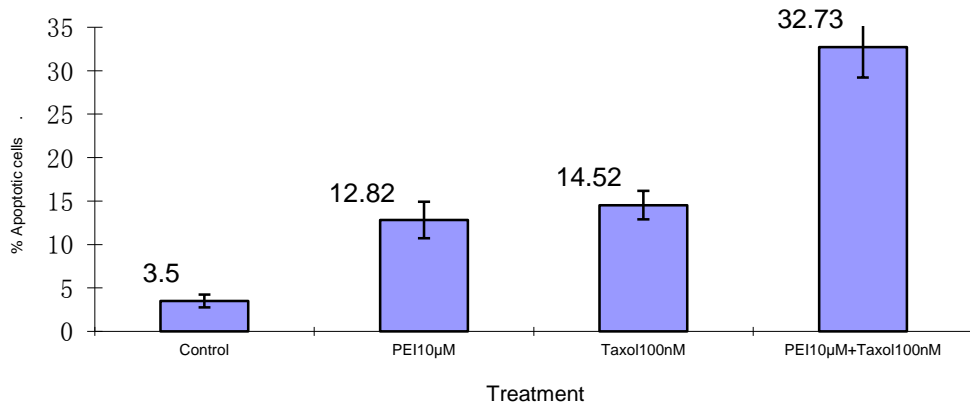

Supplement: MOESM5 [file 9540436]
